# Supplementary material for: Effects of 12 Weeks Cosmos caudatus Supplement among Older Adults with Mild Cognitive Impairment: A Randomized, Double-Blind and Placebo-Controlled Trial
Source: PubMed Central journal article supplement (PMC7912368; doi:10.3390/nu13020434), 2021-01-29
Supplement: nutrients-13-00434-s001.pdf [file nutrients-13-00434-s001.pdf]

## Supplementary 1

**Table 1.** Baseline blood biochemical profiles between CC supplement group and placebo group subjects [presented as mean  $\pm$  standard deviation]

| Parameter                      | CC supplement (n=24) | Placebo (n=24)    | Total (n=48)      | Normal range | p-value |
|--------------------------------|----------------------|-------------------|-------------------|--------------|---------|
| Fasting blood sugar (mmol/L)   | 5.77 $\pm$ 2.05      | 5.67 $\pm$ 1.63   | 5.72 $\pm$ 1.83   | 3.9-5.6      | 0.856   |
| Urea (mmol/L)                  | 5.15 $\pm$ 1.36      | 4.62 $\pm$ 1.08   | 4.88 $\pm$ 1.24   | 1.7-8.4      | 0.144   |
| Creatinine ( $\mu$ mol/L)      | 69.30 $\pm$ 14.91    | 66.17 $\pm$ 18.32 | 67.70 $\pm$ 16.63 | 62-115       | 0.524   |
| Calcium (mmol/L)               | 2.28 $\pm$ 0.10      | 2.27 $\pm$ 0.08   | 2.27 $\pm$ 0.09   | 2.12-2.52    | 0.742   |
| Inorganic phosphate (mmol/L)   | 1.21 $\pm$ 0.13      | 1.25 $\pm$ 0.14   | 1.23 $\pm$ 0.13   | 0.78-1.65    | 0.295   |
| Uric acid (mmol/L)             | 0.32 $\pm$ 0.07      | 0.36 $\pm$ 0.09   | 0.34 $\pm$ 0.08   | 0.20-0.42    | 0.112   |
| Sodium (mmol/L)                | 139.61 $\pm$ 4.44    | 139.83 $\pm$ 2.35 | 139.72 $\pm$ 3.49 | 137-150      | 0.828   |
| Potassium (mmol/L)             | 4.80 $\pm$ 0.47      | 4.66 $\pm$ 0.28   | 4.73 $\pm$ 0.39   | 3.5-5.3      | 0.234   |
| Chloride (mmol/L)              | 102.04 $\pm$ 4.51    | 103.13 $\pm$ 2.82 | 102.60 $\pm$ 3.75 | 96-108       | 0.328   |
| Total cholesterol (mmol/L)     | 5.42 $\pm$ 1.01      | 5.25 $\pm$ 1.03   | 5.33 $\pm$ 1.01   | <5.2         | 0.566   |
| HDL (mmol/L)                   | 1.52 $\pm$ 0.35      | 1.61 $\pm$ 0.37   | 1.57 $\pm$ 0.36   | >1.04        | 0.387   |
| LDL (mmol/L)                   | 3.30 $\pm$ 0.84      | 2.98 $\pm$ 0.96   | 3.13 $\pm$ 0.91   | <2.6         | 0.230   |
| Triglyceride (mmol/L)          | 1.34 $\pm$ 0.79      | 1.45 $\pm$ 0.62   | 1.40 $\pm$ 0.71   | <1.7         | 0.624   |
| Total cholesterol to HDL ratio | 3.68 $\pm$ 0.78      | 3.36 $\pm$ 0.81   | 3.51 $\pm$ 0.80   | <5.0         | 0.173   |
| Total protein (g/L)            | 70.91 $\pm$ 7.84     | 69.17 $\pm$ 2.82  | 70.02 $\pm$ 5.85  | 57-82        | 0.311   |
| Albumin (g/L)                  | 42.96 $\pm$ 2.88     | 43.29 $\pm$ 2.40  | 43.13 $\pm$ 2.63  | 32-48        | 0.667   |
| Globulin (g/L)                 | 28.00 $\pm$ 8.03     | 25.88 $\pm$ 3.57  | 26.91 $\pm$ 6.20  | 20-50        | 0.244   |
| Albumin to globulin ratio      | 1.61 $\pm$ 0.33      | 1.71 $\pm$ 0.28   | 1.66 $\pm$ 0.31   | 1.2-2.5      | 0.273   |
| Total bilirubin ( $\mu$ mol/L) | 12.61 $\pm$ 5.81     | 11.83 $\pm$ 4.27  | 12.21 $\pm$ 5.04  | 3-19         | 0.603   |
| AST (IU/L)                     | 27.13 $\pm$ 12.22    | 23.21 $\pm$ 5.43  | 25.13 $\pm$ 9.49  | 0-40         | 0.159   |
| ALP (IU/L)                     | 75.91 $\pm$ 22.00    | 70.58 $\pm$ 13.76 | 73.19 $\pm$ 18.26 | 39-117       | 0.323   |
| ALT (IU/L)                     | 25.35 $\pm$ 4.10     | 23.13 $\pm$ 4.89  | 24.21 $\pm$ 19.75 | 0-40         | 0.704   |
| GGT (IU/L)                     | 28.35 $\pm$ 8.6      | 24.00 $\pm$ 5.22  | 26.13 $\pm$ 2.62  | <73          | 0.516   |

Not significant at  $p > 0.05$

HDL: high density lipoprotein; LDL: low-density lipoprotein; AST: aspartate aminotransferase; ALP: alkaline phosphatase; ALT: alanine transferase; GGT: gamma-glutamyl transferase
